# Supplementary material for: Reversible switching of arylazopyrazole within a metal–organic cage
Source: Beilstein J Org Chem. 2019 Oct 10;15:2398–407. doi: 10.3762/bjoc.15.232 (PMC6808206; doi:10.3762/bjoc.15.232)
Supplement: File 3 — Energy-optimized structure for inclusion complex (Z-1)2. [file Beilstein_J_Org_Chem-15-2398-s003.mol2]

# model made from 'a3'. Pyr AzB rotated 180 deg to bettet fit NOESY cont acts. O
# Created by GaussView 6.0.16
#

#
#

@<TRIPOS>MOLECULE
Molecule Name
352 367
SMALL
NO_CHARGES


@<TRIPOS>ATOM
1 Pd1     9.6130    -0.0630    -1.7130 Pd
2 N2    11.1520    -1.4050    -1.1660 N
3 N3    10.8250     1.4360    -0.8090 N
4 N4     8.0850     1.2250    -2.2370 N
5 N5     8.3940    -1.5930    -2.4270 N
6 C6    12.3330    -0.5210    -0.9000 C
7 C7    10.7240    -2.1500     0.0500 C
8 C8    11.5120    -2.3650    -2.2500 C
9 C9    11.9060     0.6860    -0.0910 C
10 C10    10.0700     2.2530     0.1790 C
11 C11    11.4030     2.3350    -1.8550 C
12 C12     7.6190     1.3840    -3.5350 C
13 C13     7.1820     1.7290    -1.4100 C
14 C14     8.4560    -2.4080    -3.5470 C
15 C15     7.3230    -1.9390    -1.7350 C
16 H16    12.7240    -0.2170    -1.8730 H
17 H17    13.1090    -1.0900    -0.3710 H
18 H18     9.8720    -2.7780    -0.2080 H
19 H19    10.4000    -1.4680     0.8360 H
20 H20    11.5480    -2.7800     0.4090 H
21 H21    12.4200    -2.9080    -1.9620 H
22 H22    11.6750    -1.8040    -3.1730 H
23 H23    10.7000    -3.0800    -2.3770 H
24 H24    12.7590     1.3520     0.0890 H
25 H25    11.5120     0.3850     0.8820 H
26 H26    10.7690     2.8900     0.7360 H
27 H27     9.5190     1.6120     0.8690 H
28 H28     9.3720     2.8950    -0.3560 H
29 H29    10.5900     2.8160    -2.3960 H
30 H30    11.9730     1.7590    -2.5840 H
31 H31    12.0330     3.0900    -1.3690 H
32 H32     8.2030     1.0360    -4.3780 H
33 C33     6.4060     2.0030    -3.4720 C
34 N34     6.1310     2.2170    -2.1190 N
35 H35     7.2500     1.7690    -0.3330 H
36 C36     7.4010    -3.2760    -3.5050 C
37 H37     9.2280    -2.2580    -4.2860 H
38 N38     6.6880    -2.9740    -2.3470 N
39 H39     6.9610    -1.4650    -0.8380 H
40 H40     5.7140     2.2820    -4.2490 H
41 C41     4.9640     2.8000    -1.5560 C
42 H42     7.1130    -4.0780    -4.1660 H
43 C43     5.5000    -3.5530    -1.8270 C
44 C44     4.2500     3.7360    -2.3040 C
45 C45     4.5570     2.4220    -0.2720 C
46 H46     5.1070     1.6580     0.2670 H
47 C47     5.3060    -3.4930    -0.4470 C
48 C48     4.5370    -4.1120    -2.6690 C
49 H49     4.6140     4.0620    -3.2700 H
50 C50     3.0810     4.2680    -1.7610 C
51 C51     3.4140     3.0140     0.2690 C
52 C52     4.0790    -3.8910     0.0800 C
53 H53     6.0830    -3.1040     0.1980 H
54 C54     3.3410    -4.5640    -2.1010 C
55 H55     4.7080    -4.1750    -3.7370 H
56 N56     2.2820     5.1390    -2.5570 N
57 C57     2.6640     3.9330    -0.4740 C
58 N58     2.9640     2.6430     1.5700 N
59 N59     3.8330    -3.6290     1.4520 N
60 C60     3.0860    -4.4290    -0.7340 C
61 N61     2.3270    -5.1160    -2.9300 N
62 C62     2.2080     5.1490    -3.9500 C
63 C63     1.4170     6.0880    -2.1020 C
64 H64     1.7350     4.3340    -0.0910 H
65 C65     3.4090     1.5750     2.3560 C
66 C66     1.9710     3.2680     2.2700 C
67 C67     4.4210    -2.5720     2.1450 C
68 C68     2.9520    -4.2450     2.2950 C
69 H69     2.1070    -4.6590    -0.3270 H
70 C70     2.1170    -4.8790    -4.2900 C
71 C71     1.3780    -6.0020    -2.5230 C
72 H72     2.7730     4.4620    -4.5580 H
73 C73     1.2970     6.1060    -4.2930 C
74 N74     0.8190     6.6770    -3.1270 N
75 H75     1.2260     6.3120    -1.0670 H
76 H76     4.2170     0.9300     2.0470 H
77 C77     2.6550     1.5810     3.4970 C
78 N78     1.7750     2.6540     3.4260 N
79 H79     1.4230     4.1350     1.9360 H
80 H80     5.1040    -1.8830     1.6710 H
81 C81     3.8770    -2.5790     3.3900 C
82 N82     2.9760    -3.6320     3.4690 N
83 H83     2.3150    -5.0790     2.0400 H
84 C84     1.0420    -5.6350    -4.6630 C
85 H85     2.7230    -4.1910    -4.8540 H
86 N86     0.6080    -6.3320    -3.5460 N
87 H87     1.2520    -6.3700    -1.5170 H
88 H88     0.9190     6.4400    -5.2500 H
89 Pd89    -0.6000     8.1670    -2.8960 Pd
90 H90     2.6880     0.9120     4.3490 H
91 Pd91     0.4370     3.4640     4.8110 Pd
92 H92     3.9760    -1.8750     4.2020 H
93 Pd93     1.7680    -3.8320     5.1290 Pd
94 H94     0.5570    -5.7570    -5.6250 H
95 Pd95    -1.0390    -7.5610    -3.4180 Pd
96 N96     0.8730     9.6800    -2.9760 N
97 N97    -1.9590     9.7370    -2.4250 N
98 N98    -2.0840     6.7310    -2.8130 N
99 H99     1.0130     9.7360    -0.8440 H
100 N100     1.9940     4.1580     6.0620 N
101 N101    -0.8650     4.6010     6.0770 N
102 N102    -1.1720     2.7930     3.6950 N
103 N103     0.6100    -3.8850     6.9100 N
104 N104     3.2580    -4.8500     6.2620 N
105 N105     0.2710    -2.9510     4.0410 N
106 H106    -0.0360    -5.8890     6.5720 H
107 N107    -2.7110    -8.8520    -3.3160 N
108 N108     0.1130    -9.3370    -3.6530 N
109 N109    -2.1610    -5.8980    -2.9230 N
110 C110     0.0810    10.9430    -3.1420 C
111 C111     1.6640     9.6820    -1.7160 C
112 C112     1.7870     9.5230    -4.1470 C
113 C113    -1.0980    10.9440    -2.1890 C
114 C114    -2.7130     9.4190    -1.1830 C
115 C115    -2.9160     9.9850    -3.5460 C
116 C116    -2.9430     6.2830    -3.8090 C
117 C117    -2.3250     6.0340    -1.7150 C
118 C118     1.2850     4.6420     7.2910 C
119 C119     2.9390     3.0730     6.4670 C
120 C120     2.7380     5.2500     5.3810 C
121 C121     0.0560     5.4400     6.9120 C
122 C122    -1.7450     5.4920     5.2720 C
123 C123    -1.7080     3.7270     6.9440 C
124 C124    -2.0060     1.7380     4.0310 C
125 C125    -1.6530     3.3650     2.6050 C
126 C126     1.6000    -4.2260     7.9840 C
127 C127    -0.4600    -4.9090     6.7920 C
128 C128     0.0030    -2.5600     7.2430 C
129 C129     2.5520    -5.3040     7.5030 C
130 C130     3.7860    -6.0250     5.5210 C
131 C131     4.3820    -3.9300     6.6040 C
132 C132    -0.0770    -1.6130     4.1320 C
133 C133    -0.5100    -3.5300     3.1350 C
134 C134    -2.2140   -10.1430    -3.8960 C
135 C135    -3.8630    -8.3700    -4.1370 C
136 C136    -3.1320    -9.0040    -1.8980 C
137 C137    -0.8340   -10.4620    -3.3570 C
138 C138     1.2340    -9.3710    -2.6750 C
139 C139     0.6570    -9.4510    -5.0400 C
140 C140    -3.0780    -5.1540    -3.6490 C
141 C141    -2.1090    -5.4030    -1.6980 C
142 H142     0.7270    11.8120    -2.9620 H
143 H143    -0.2620    10.9680    -4.1770 H
144 H144     2.2320     8.7530    -1.6580 H
145 H145     2.3610    10.5290    -1.7130 H
146 H146     2.4270    10.4110    -4.2270 H
147 H147     1.1810     9.4010    -5.0460 H
148 H148     2.4140     8.6450    -3.9940 H
149 H149    -1.6970    11.8540    -2.3160 H
150 H150    -0.7620    10.9160    -1.1500 H
151 H151    -2.0220     9.1120    -0.3950 H
152 H152    -3.4080     8.6060    -1.3880 H
153 H153    -3.2820    10.2990    -0.8580 H
154 H154    -3.5980    10.7970    -3.2650 H
155 H155    -3.4850     9.0770    -3.7370 H
156 H156    -2.3760    10.2320    -4.4590 H
157 C157    -3.7220     5.2940    -3.2760 C
158 H158    -2.9170     6.6930    -4.8110 H
159 N159    -3.3240     5.1390    -1.9510 N
160 H160    -1.8050     6.1560    -0.7790 H
161 H161     1.0120     3.7520     7.8620 H
162 H162     1.9710     5.2470     7.8990 H
163 H163     3.5270     2.7590     5.6100 H
164 H164     2.3750     2.2240     6.8450 H
165 H165     3.6130     3.4580     7.2410 H
166 H166     3.4950     5.6650     6.0580 H
167 H167     2.0620     6.0410     5.0550 H
168 H168     3.2340     4.8370     4.5010 H
169 H169     0.3260     6.3210     6.3240 H
170 H170    -0.4730     5.7910     7.8070 H
171 H171    -2.2660     6.1940     5.9350 H
172 H172    -2.4870     4.8860     4.7530 H
173 H173    -1.1530     6.0390     4.5360 H
174 H174    -1.0850     3.1010     7.5820 H
175 H175    -2.3170     3.0790     6.3150 H
176 H176    -2.3670     4.3520     7.5600 H
177 H177    -1.7990     1.0930     4.8780 H
178 C178    -3.0170     1.6910     3.1120 C
179 N179    -2.7890     2.7240     2.2090 N
180 H180    -1.2130     4.2140     2.1050 H
181 H181     1.0700    -4.5520     8.8880 H
182 H182     2.1390    -3.3040     8.2130 H
183 H183    -1.1250    -4.6270     5.9750 H
184 H184    -1.0350    -4.9630     7.7250 H
185 H185    -0.4690    -2.6170     8.2310 H
186 H186     0.7890    -1.8070     7.2510 H
187 H187    -0.7520    -2.2960     6.5060 H
188 H188     3.2860    -5.5480     8.2820 H
189 H189     2.0140    -6.2240     7.2610 H
190 H190     2.9620    -6.6730     5.2170 H
191 H191     4.3110    -5.6790     4.6310 H
192 H192     4.4820    -6.5900     6.1560 H
193 H193     5.1200    -4.4660     7.2140 H
194 H194     4.8570    -3.5970     5.6820 H
195 H195     4.0100    -3.0610     7.1470 H
196 C196    -1.1130    -1.3950     3.2760 C
197 H197     0.4310    -0.9190     4.7860 H
198 N198    -1.3810    -2.6030     2.6490 N
199 H199    -0.4480    -4.5580     2.8050 H
200 H200    -2.1840   -10.0090    -4.9790 H
201 H201    -2.9200   -10.9500    -3.6600 H
202 H202    -4.2820    -7.4790    -3.6730 H
203 H203    -3.5040    -8.1440    -5.1430 H
204 H204    -4.6310    -9.1530    -4.1690 H
205 H205    -3.9550    -9.7270    -1.8270 H
206 H206    -2.3000    -9.3350    -1.2770 H
207 H207    -3.4710    -8.0360    -1.5270 H
208 H208    -0.8590   -10.5990    -2.2730 H
209 H209    -0.4520   -11.3910    -3.7970 H
210 H210     1.7050   -10.3620    -2.6860 H
211 H211     1.9760    -8.6270    -2.9590 H
212 H212     0.8650    -9.1460    -1.6720 H
213 H213    -0.1530    -9.4720    -5.7680 H
214 H214     1.2680    -8.5760    -5.2560 H
215 H215     1.2670   -10.3600    -5.1150 H
216 C216    -3.6060    -4.1990    -2.8250 C
217 H217    -3.2510    -5.3680    -4.6920 H
218 N218    -2.9770    -4.3600    -1.5910 N
219 H219    -1.4710    -5.7630    -0.9050 H
220 H220    -4.4520     4.6420    -3.7270 H
221 C221    -3.8850     4.2850    -0.9640 C
222 H222    -3.8310     0.9980     2.9880 H
223 C223    -3.6140     3.1060     1.1170 C
224 H224    -1.6250    -0.5020     2.9770 H
225 C225    -2.4310    -2.8020     1.7110 C
226 H226    -4.3640    -3.4470    -2.9960 H
227 C227    -3.2140    -3.6320    -0.3930 C
228 C228    -3.0650     3.8580     0.0790 C
229 C229    -5.2350     3.9250    -1.0210 C
230 C230    -4.9610     2.7460     1.0930 C
231 C231    -3.6940    -2.2780     1.9950 C
232 C232    -2.1680    -3.4650     0.5170 C
233 C233    -4.4880    -3.1320    -0.1390 C
234 H234    -2.0110     4.1000     0.0720 H
235 H235    -5.8810     4.2600    -1.8220 H
236 C236    -5.7480     3.1450     0.0120 C
237 H237    -5.4160     2.1730     1.8910 H
238 C238    -4.7110    -2.4400     1.0560 C
239 H239    -3.8700    -1.7510     2.9250 H
240 H240    -1.1690    -3.8260     0.3080 H
241 H241    -5.2960    -3.2950    -0.8420 H
242 N242    -7.1210     2.7420     0.0180 N
243 N243    -6.0130    -1.9340     1.3100 N
244 C244    -8.0870     3.1690     0.9290 C
245 C245    -7.6000     1.6270    -0.5960 C
246 C246    -6.6960    -1.8610     2.5250 C
247 C247    -6.8680    -1.5250     0.3350 C
248 H248    -6.6080    -1.4860    -0.7150 H
249 H249    -7.0670     1.0430    -1.3300 H
250 H250    -7.9340     4.0390     1.5470 H
251 C251    -9.1310     2.2950     0.8230 C
252 N252    -8.8040     1.3400    -0.1240 N
253 C253    -7.9580    -1.4160     2.2400 C
254 H254    -6.2440    -2.1730     3.4520 H
255 N255    -8.0400    -1.2230     0.8690 N
256 H256   -10.0390     2.2070     1.4010 H
257 Pd257    -9.6040    -0.5780    -0.3210 Pd
258 H258    -8.8070    -1.2360     2.8880 H
259 N259    -2.3800     0.4420    -0.1420 N
260 N260   -11.1480     0.0420    -1.6090 N
261 N261   -10.3720    -2.5570    -0.5980 N
262 N262    -1.4430    -0.1470     0.4590 N
263 C263   -12.0730    -1.1340    -1.6820 C
264 C264   -10.5720     0.3680    -2.9460 C
265 C265   -11.8840     1.2210    -1.0700 C
266 C266   -11.2710    -2.4190    -1.7890 C
267 C267    -9.3280    -3.5790    -0.8820 C
268 C268   -11.1360    -2.9910     0.6090 C
269 C269    -0.2020    -0.4910    -0.1650 C
270 H270   -12.6750    -1.1260    -0.7720 H
271 H271   -12.7450    -1.0220    -2.5420 H
272 H272    -9.9010     1.2190    -2.8350 H
273 H273    -9.9860    -0.4630    -3.3380 H
274 H274   -11.3850     0.6280    -3.6360 H
275 H275   -12.7640     1.4170    -1.6950 H
276 H276   -12.1760     1.0160    -0.0380 H
277 H277   -11.2260     2.0900    -1.1020 H
278 H278   -11.9410    -3.2870    -1.8470 H
279 H279   -10.6370    -2.4150    -2.6790 H
280 H280    -9.8150    -4.5470    -1.0610 H
281 H281    -8.7500    -3.3090    -1.7630 H
282 H282    -8.6780    -3.6700    -0.0130 H
283 H283   -10.4520    -3.0730     1.4510 H
284 H284   -11.8860    -2.2530     0.8870 H
285 H285   -11.5980    -3.9660     0.4080 H
286 C286    -0.1550    -1.1440    -1.4090 C
287 C287     0.9740    -0.3100     0.5760 C
288 C288     1.0710    -1.5500    -1.9300 C
289 C289     2.2010    -0.6940     0.0310 C
290 H290     1.1020    -2.0600    -2.8890 H
291 C291     2.2540    -1.3020    -1.2250 C
292 H292     3.1150    -0.5350     0.5910 H
293 H293     3.2110    -1.6030    -1.6390 H
294 O294     7.3270     1.0510     1.5960 O
295 O295     7.8540    -1.0380     1.2060 O
296 O296     5.8730    -0.2910     0.6720 O
297 O297     9.8690    -0.2970    -4.9040 O
298 O298    10.5170     1.7740    -4.7080 O
299 O299    11.8370     0.1560    -4.0580 O
300 O300    -0.1170     5.1580     0.5110 O
301 O301     0.3810    -5.1870     0.4610 O
302 O302    -0.1470     7.3420     0.5330 O
303 O303     0.1320     6.2250     2.3990 O
304 O304     0.5780    -6.6070     2.1040 O
305 O305     0.0040    -7.3090     0.1080 O
306 O306    -0.8420     7.2460    -5.9010 O
307 O307     0.5670     0.9580     5.7420 O
308 O308     3.9350     0.2880     6.3510 O
309 O309     2.5690    -1.2160     5.5770 O
310 O310    -1.7740    -6.3020    -6.0280 O
311 O311    -0.8080     9.4370    -5.8440 O
312 O312    -2.6920     8.3710    -6.1280 O
313 O313     0.2960     1.4640     7.8480 O
314 O314     3.0360    -1.1680     7.7130 O
315 O315    -1.8830    -8.4130    -6.5980 O
316 O316    -7.5080    -0.4320    -2.6900 O
317 O317    -8.3110    -2.2090    -3.6610 O
318 O318    -6.4090    -2.3190    -2.5880 O
319 O319   -10.3810     0.6100     2.7220 O
320 O320   -10.9880    -1.4310     3.1710 O
321 O321   -12.1030    -0.2670     1.6920 O
322 N322     7.0370    -0.0940     1.1810 N
323 N323    10.7460     0.5560    -4.5700 N
324 N324    -0.0430     6.2650     1.1650 N
325 N325     0.3190    -6.3860     0.9020 N
326 N326    -1.4520     8.3510    -5.9750 N
327 N327    -0.1170     0.8900     6.8130 N
328 N328     3.1860    -0.6840     6.5620 N
329 N329    -1.2510    -7.3160    -6.5780 N
330 N330    -7.4120    -1.6530    -3.0000 N
331 N331   -11.1640    -0.3620     2.5400 N
332 O332    -1.2150     0.2780     6.8010 O
333 O333    -0.0980    -7.2410    -7.0570 O
334 H334    -1.0730    -1.3260    -1.9560 H
335 H335     0.9210     0.1410     1.5620 H
336 C336    -2.2430     1.0650    -1.3930 C
337 C337    -1.2450     1.9170    -1.8840 C
338 C338    -3.3100     1.1500    -2.3320 C
339 N339    -1.7390     2.4230    -3.0400 N
340 N340    -2.9880     1.9590    -3.3370 N
341 C341    -4.6020     0.4130    -2.2750 C
342 H342    -4.9560     0.3700    -1.2410 H
343 H343    -5.3580     0.8820    -2.9040 H
344 H344    -4.5160    -0.6250    -2.6120 H
345 C345    -1.0760     3.3470    -3.9470 C
346 H346    -0.1240     2.9320    -4.2880 H
347 H347    -1.7330     3.4980    -4.8010 H
348 H348    -0.8900     4.3100    -3.4650 H
349 C349     0.0470     2.3710    -1.3040 C
350 H350     0.8850     1.7380    -1.6130 H
351 H351     0.2530     3.4010    -1.5990 H
352 H352     0.0060     2.3410    -0.2130 H
@<TRIPOS>BOND
1 1 4 1
2 1 5 1
3 1 2 1
4 1 3 1
5 2 6 1
6 2 7 1
7 2 8 1
8 3 9 1
9 3 10 1
10 3 11 1
11 4 12 1
12 4 13 Ar
13 5 14 1
14 5 15 2
15 6 9 1
16 6 16 1
17 6 17 1
18 7 18 1
19 7 19 1
20 7 20 1
21 8 21 1
22 8 22 1
23 8 23 1
24 9 24 1
25 9 25 1
26 10 26 1
27 10 27 1
28 10 28 1
29 11 29 1
30 11 30 1
31 11 31 1
32 12 32 1
33 12 33 2
34 13 34 Ar
35 13 35 1
36 14 36 2
37 14 37 1
38 15 38 Ar
39 15 39 1
40 33 34 1
41 33 40 1
42 34 41 1
43 36 38 1
44 36 42 1
45 38 43 1
46 41 44 Ar
47 41 45 Ar
48 43 47 Ar
49 43 48 Ar
50 44 49 1
51 44 50 Ar
52 45 46 1
53 45 51 Ar
54 47 52 Ar
55 47 53 1
56 48 54 Ar
57 48 55 1
58 50 56 1
59 50 57 Ar
60 51 57 Ar
61 51 58 1
62 52 59 1
63 52 60 Ar
64 54 60 Ar
65 54 61 1
66 56 62 1
67 56 63 Ar
68 57 64 1
69 58 65 1
70 58 66 Ar
71 59 67 1
72 59 68 Ar
73 60 69 1
74 61 70 1
75 61 71 Ar
76 62 72 1
77 62 73 2
78 63 74 Ar
79 63 75 1
80 65 76 1
81 65 77 2
82 66 78 Ar
83 66 79 1
84 67 80 1
85 67 81 2
86 68 82 Ar
87 68 83 1
88 70 84 2
89 70 85 1
90 71 86 2
91 71 87 1
92 73 74 1
93 73 88 1
94 74 89 1
95 77 78 1
96 77 90 1
97 78 91 1
98 81 82 1
99 81 92 1
100 82 93 1
101 84 86 1
102 84 94 1
103 86 95 1
104 89 98 1
105 89 97 1
106 89 96 1
107 91 102 1
108 91 101 1
109 91 100 1
110 93 105 1
111 93 103 1
112 93 104 1
113 95 109 1
114 95 107 1
115 95 108 1
116 96 110 1
117 96 111 1
118 96 112 1
119 97 113 1
120 97 114 1
121 97 115 1
122 98 116 1
123 98 117 2
124 99 111 1
125 100 118 1
126 100 119 1
127 100 120 1
128 101 121 1
129 101 122 1
130 101 123 1
131 102 124 1
132 102 125 2
133 103 126 1
134 103 127 1
135 103 128 1
136 104 129 1
137 104 130 1
138 104 131 1
139 105 132 1
140 105 133 Ar
141 106 127 1
142 107 134 1
143 107 135 1
144 107 136 1
145 108 137 1
146 108 138 1
147 108 139 1
148 109 140 1
149 109 141 2
150 110 113 1
151 110 142 1
152 110 143 1
153 111 144 1
154 111 145 1
155 112 146 1
156 112 147 1
157 112 148 1
158 113 149 1
159 113 150 1
160 114 151 1
161 114 152 1
162 114 153 1
163 115 154 1
164 115 155 1
165 115 156 1
166 116 157 2
167 116 158 1
168 117 159 Ar
169 117 160 1
170 118 121 1
171 118 161 1
172 118 162 1
173 119 163 1
174 119 164 1
175 119 165 1
176 120 166 1
177 120 167 1
178 120 168 1
179 121 169 1
180 121 170 1
181 122 171 1
182 122 172 1
183 122 173 1
184 123 174 1
185 123 175 1
186 123 176 1
187 124 177 1
188 124 178 2
189 125 179 Ar
190 125 180 1
191 126 129 1
192 126 181 1
193 126 182 1
194 127 183 1
195 127 184 1
196 128 185 1
197 128 186 1
198 128 187 1
199 129 188 1
200 129 189 1
201 130 190 1
202 130 191 1
203 130 192 1
204 131 193 1
205 131 194 1
206 131 195 1
207 132 196 2
208 132 197 1
209 133 198 Ar
210 133 199 1
211 134 137 1
212 134 200 1
213 134 201 1
214 135 202 1
215 135 203 1
216 135 204 1
217 136 205 1
218 136 206 1
219 136 207 1
220 137 208 1
221 137 209 1
222 138 210 1
223 138 211 1
224 138 212 1
225 139 213 1
226 139 214 1
227 139 215 1
228 140 216 2
229 140 217 1
230 141 218 Ar
231 141 219 1
232 157 159 1
233 157 220 1
234 159 221 1
235 178 179 1
236 178 222 1
237 179 223 1
238 196 198 1
239 196 224 1
240 198 225 1
241 216 218 1
242 216 226 1
243 218 227 1
244 221 228 Ar
245 221 229 Ar
246 223 228 Ar
247 223 230 Ar
248 225 231 Ar
249 225 232 Ar
250 227 232 Ar
251 227 233 Ar
252 228 234 1
253 229 235 1
254 229 236 Ar
255 230 236 Ar
256 230 237 1
257 231 238 Ar
258 231 239 1
259 232 240 1
260 233 238 Ar
261 233 241 1
262 236 242 1
263 238 243 1
264 242 244 1
265 242 245 Ar
266 243 246 1
267 243 247 Ar
268 244 250 1
269 244 251 2
270 245 249 1
271 245 252 Ar
272 246 253 2
273 246 254 1
274 247 248 1
275 247 255 2
276 251 252 1
277 251 256 1
278 252 257 1
279 253 255 1
280 253 258 1
281 255 257 1
282 257 260 1
283 257 261 1
284 259 262 2
285 259 336 1
286 260 263 1
287 260 264 1
288 260 265 1
289 261 266 1
290 261 267 1
291 261 268 1
292 262 269 1
293 263 266 1
294 263 270 1
295 263 271 1
296 264 272 1
297 264 273 1
298 264 274 1
299 265 275 1
300 265 276 1
301 265 277 1
302 266 278 1
303 266 279 1
304 267 280 1
305 267 281 1
306 267 282 1
307 268 283 1
308 268 284 1
309 268 285 1
310 269 286 Ar
311 269 287 Ar
312 286 288 Ar
313 286 334 1
314 287 289 Ar
315 287 335 1
316 288 290 1
317 288 291 Ar
318 289 291 Ar
319 289 292 1
320 291 293 1
321 294 322 Ar
322 295 322 Ar
323 296 322 1
324 297 323 Ar
325 298 323 Ar
326 299 323 Ar
327 300 324 1
328 301 325 1
329 302 324 Ar
330 303 324 Ar
331 304 325 Ar
332 305 325 Ar
333 306 326 Ar
334 307 327 Ar
335 308 328 Ar
336 309 328 Ar
337 310 329 Ar
338 311 326 Ar
339 312 326 Ar
340 313 327 Ar
341 314 328 Ar
342 315 329 Ar
343 316 330 Ar
344 317 330 Ar
345 318 330 Ar
346 319 331 Ar
347 320 331 Ar
348 321 331 Ar
349 327 332 Ar
350 329 333 Ar
351 336 337 Ar
352 336 338 Ar
353 337 339 Ar
354 337 349 1
355 338 340 Ar
356 338 341 1
357 339 340 1
358 339 345 1
359 341 342 1
360 341 343 1
361 341 344 1
362 345 346 1
363 345 347 1
364 345 348 1
365 349 350 1
366 349 351 1
367 349 352 1
